# Supplementary material for: Genetic variation at MECOM, TERT, JAK2 and HBS1L-MYB predisposes to myeloproliferative neoplasms
Source: PubMed Central journal article supplement (PMC4396373; doi:10.1038/ncomms7691), 2015-04-07
Supplement: ncomms7691-s1.pdf [file ncomms7691-s1.pdf]

## Supplementary information

### Supplementary figure 1. Flow chart of study design

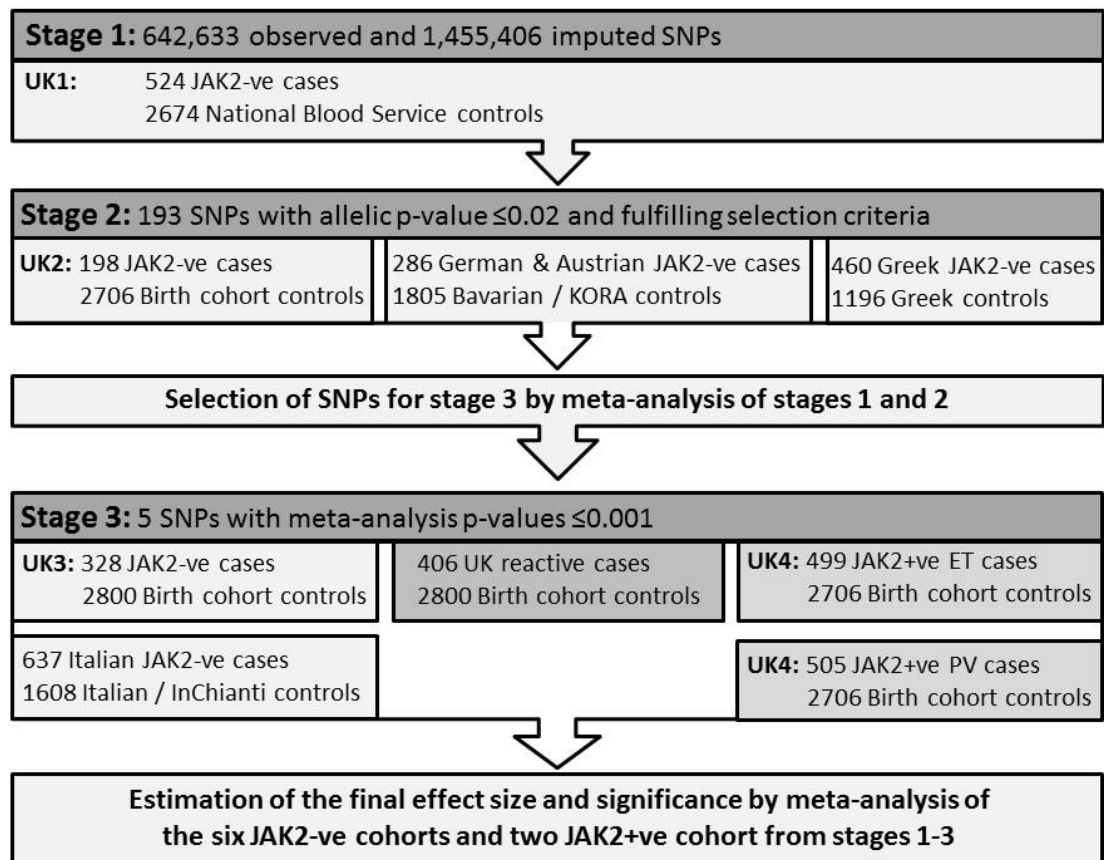

Supplementary Figure 2. Quantile-quantile plot of stage 1 results

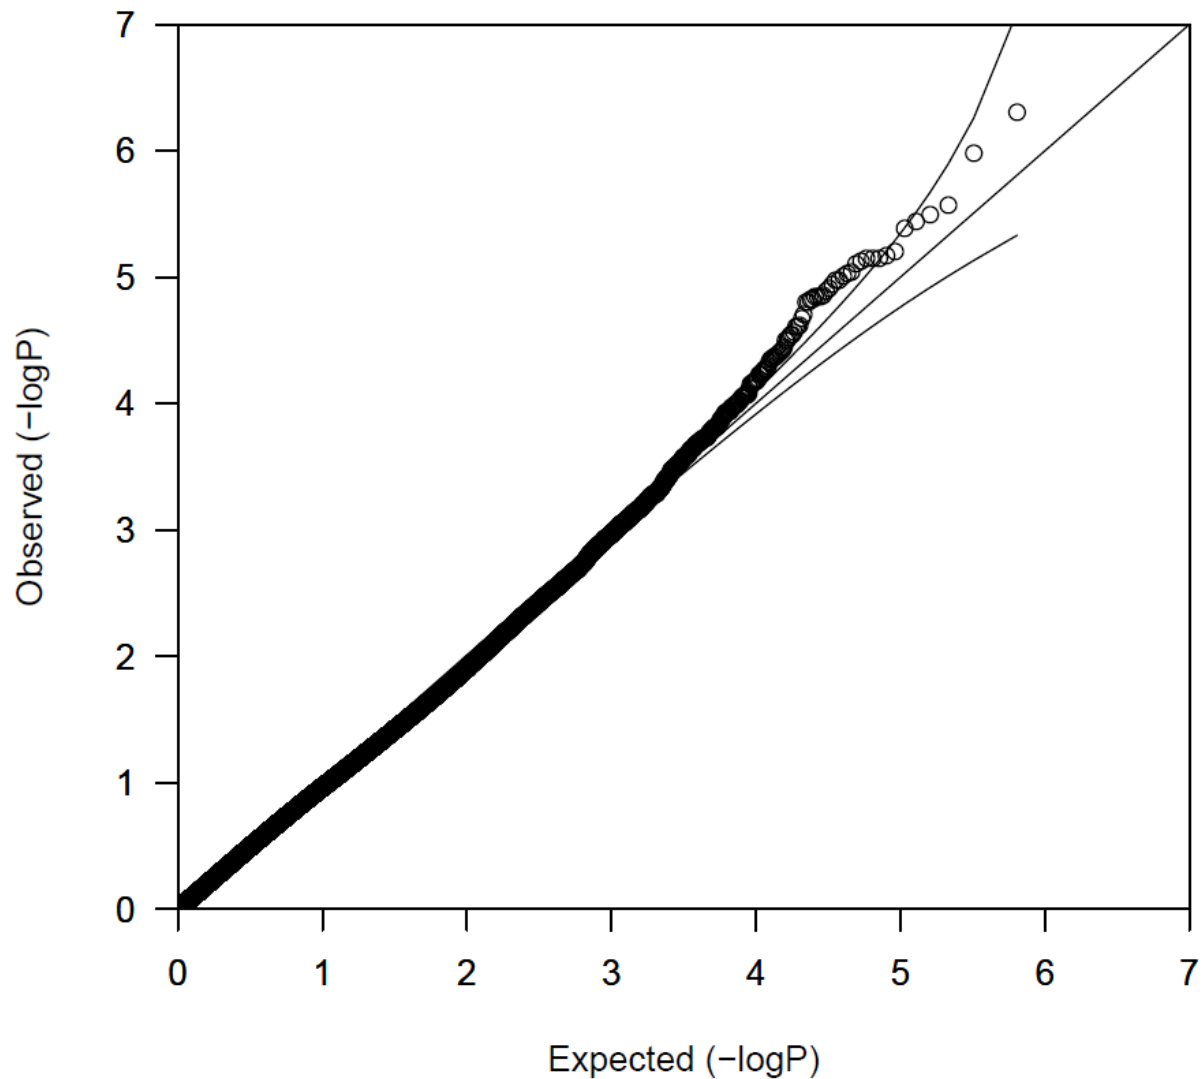

QQ plot of the observed  $-\log_{10}$  P-values (y axis) versus the expected  $-\log_{10}$  rank P-values (x axis) for allelic chi-square tests of association of 642,633 SNPs, with the risk of developing  $JAK2^{V617F}$  negative MPN (genomic inflation factor,  $\lambda=1$ ) in the discovery phase. The region between the curved lines indicates bootstrapped 95% confidence intervals. The diagonal black line indicates expected results under null hypothesis.

**Supplementary Figure 3. A plot of the stage 1 GWAs in the region of *CALR* showing no evidence for germline variation contributing to the acquisition of somatic *CALR* mutations**

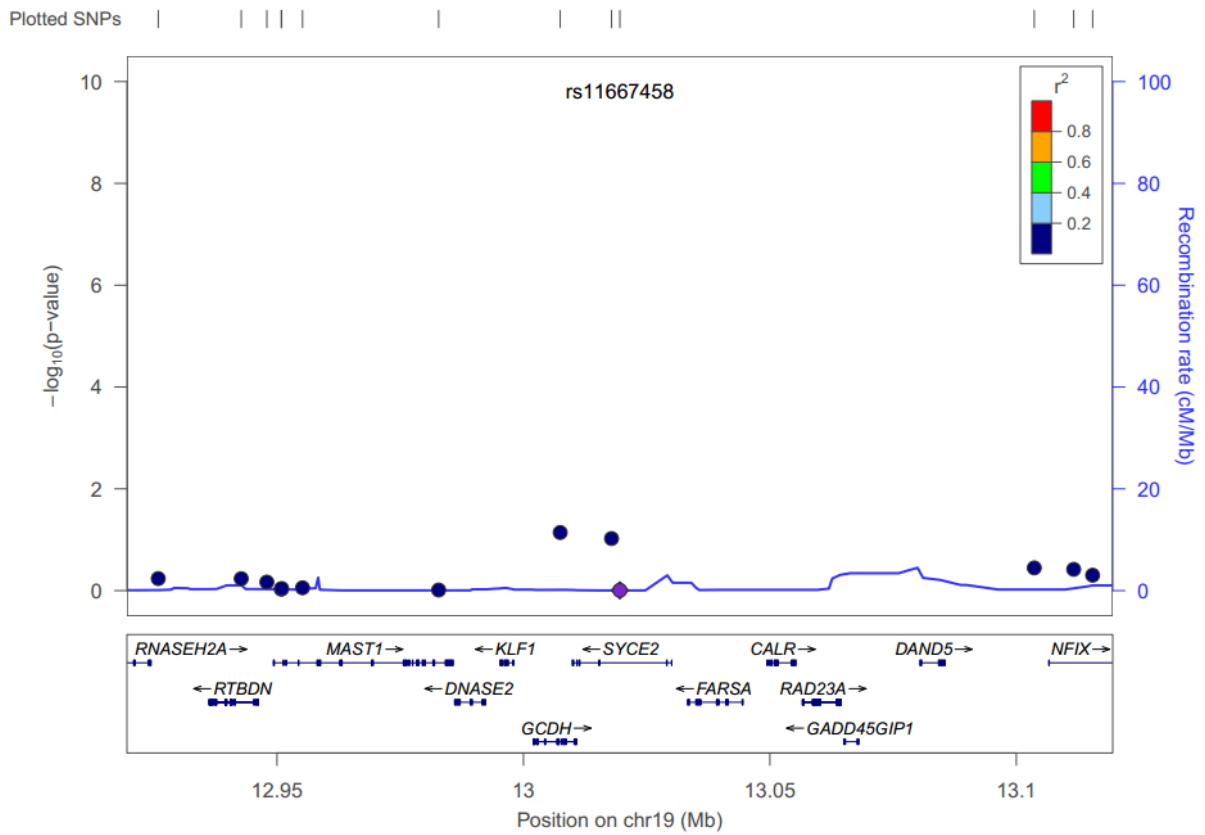

Supplementary Figure 4.

A) *MYB* (two alternatively spliced isoforms represented by exons 5-6 and exons 10-13) and *HBS1L* expression quantified in normal individuals with one or two *HMIP* risk alleles (*rs9376092*: AA or AC) compared to those with no risk allele (*rs9376092*: CC) performed on A) PB granulocytes, B) erythroid progenitors (BFU-E), and C) granulocyte-macrophage progenitors (CFU-GM).

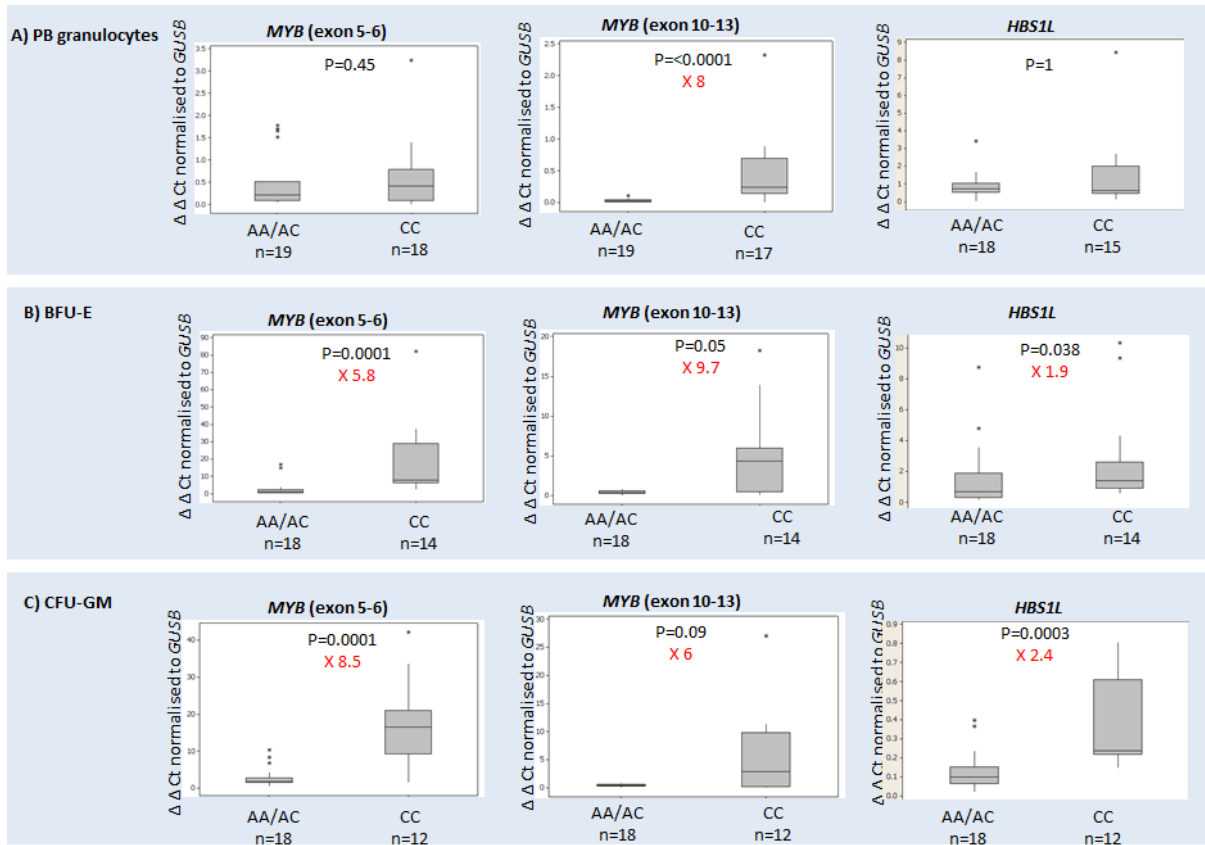

*MYB* and *HBS1L* expression was normalised to *GUSB*, and after grouping samples according to *rs9376092* genotype (only one case was AA and so AA and AC genotypes were combined), expression levels were compared using the Mann-Whitney test. The fold difference in median expression is indicated in red.

B). Expression analysis in BFU-E colonies of MPN cases (PV,  $n=16$ ; ET,  $n=20$ ). Individual colonies were plucked, genotyped, pooled and analysed by Illumina Human-6 v2.0 Expression BeadChips as previously described<sup>1</sup>. Results of wild type (WT) and  $JAK2^{V617F}$  mutant (VF) colonies from individual cases are shown in pale blue for ET and pale red for PV. The mean for each subtype is indicated by the strong blue and red lines and shows a significant difference for *MYB* expression in ET (Mann-Whitney test  $P=0.0009$ ;  $q=0.01$ ) but no other significant differences.

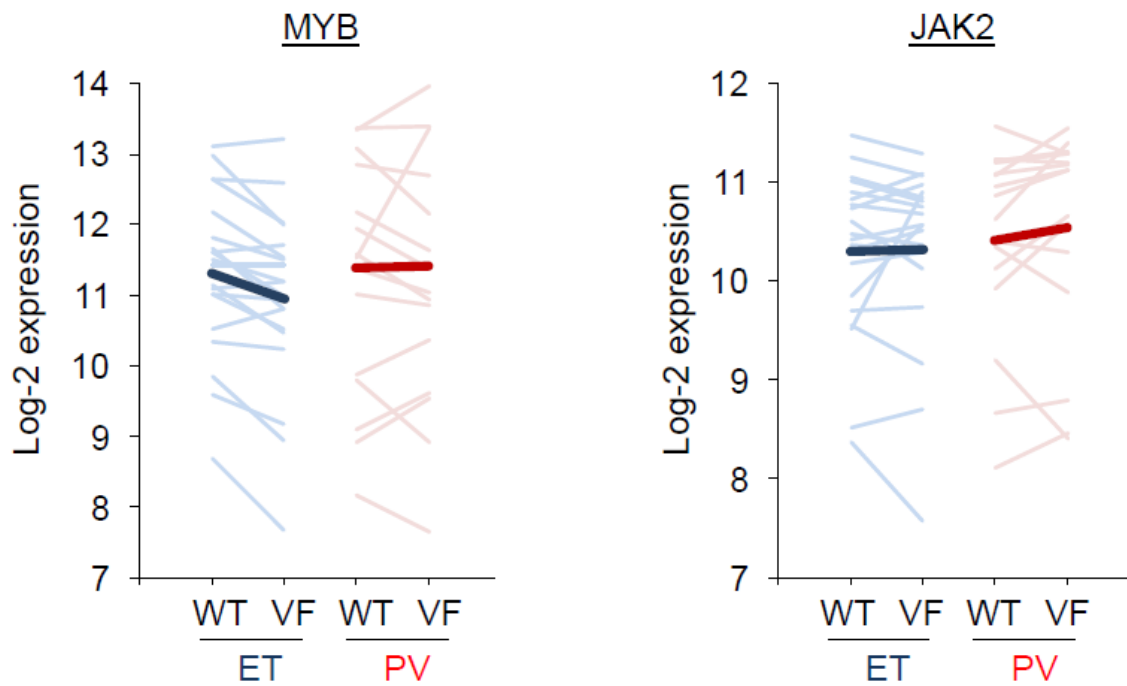

Supplementary Figure 5. Copy number changes and regions of acquired uniparental disomy (aUPD) in the 524 Stage 1 cases

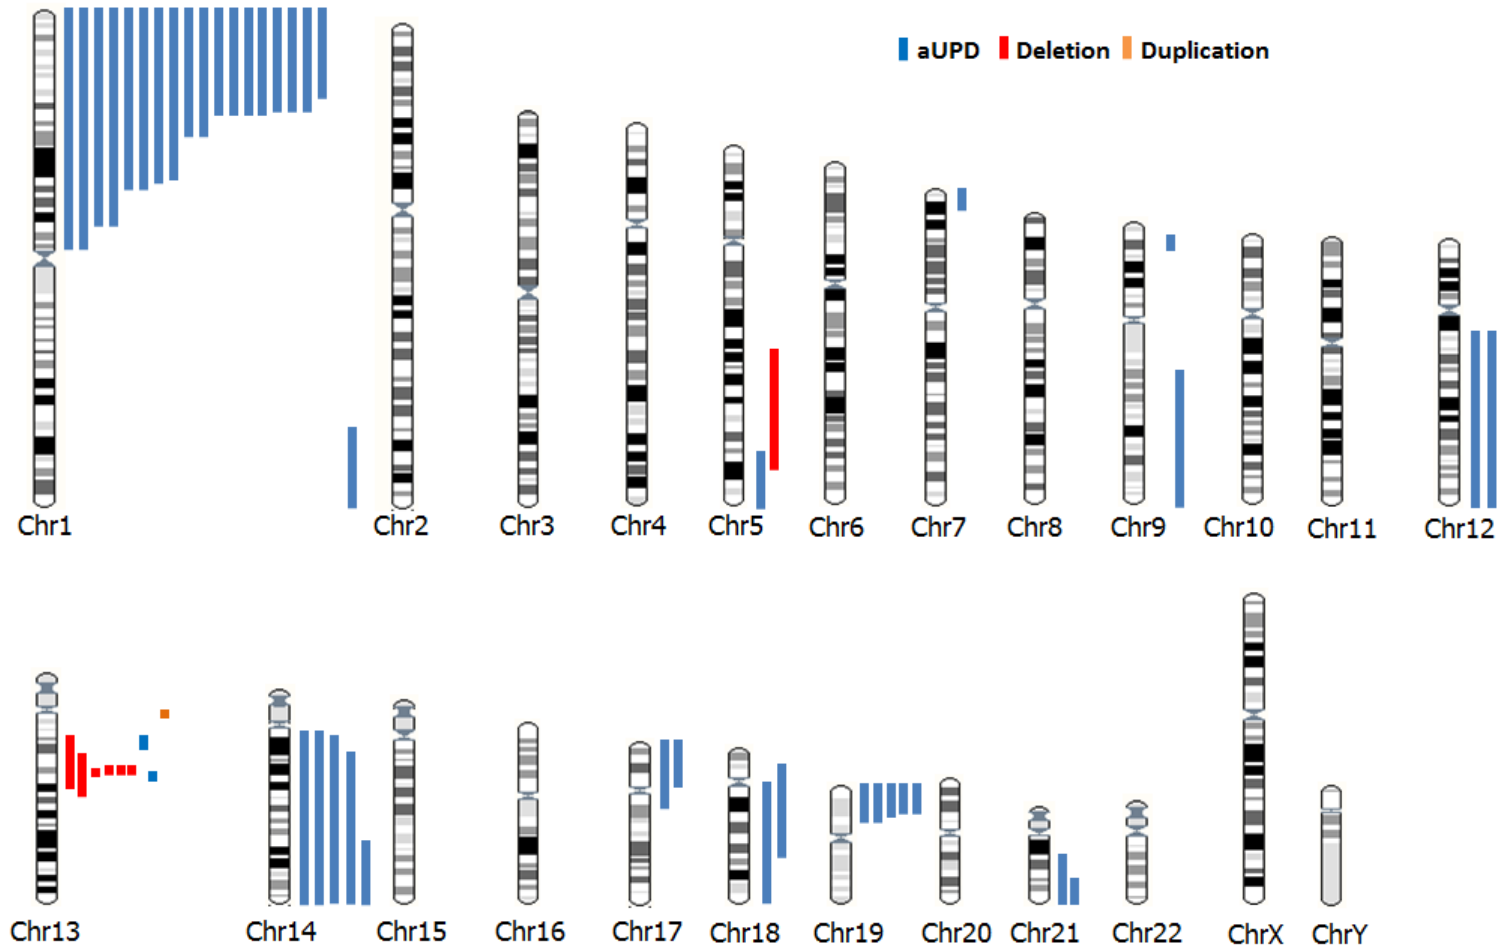

Selected cases were investigated for somatic mutations: of the 18 cases with 1p aUPD, 11/17 tested had *MPL* W515 mutations; the single case with 9p aUPD tested negative for *JAK2* exon12 and 14 mutations; 5/5 cases with 19p aUPD had *CALR* mutations, of which 2 were Type 1 and 3 were Type 2<sup>2</sup>

Supplementary Figure 6. Multi-dimensional Scaling (MDS) plot of ethnicity clustering

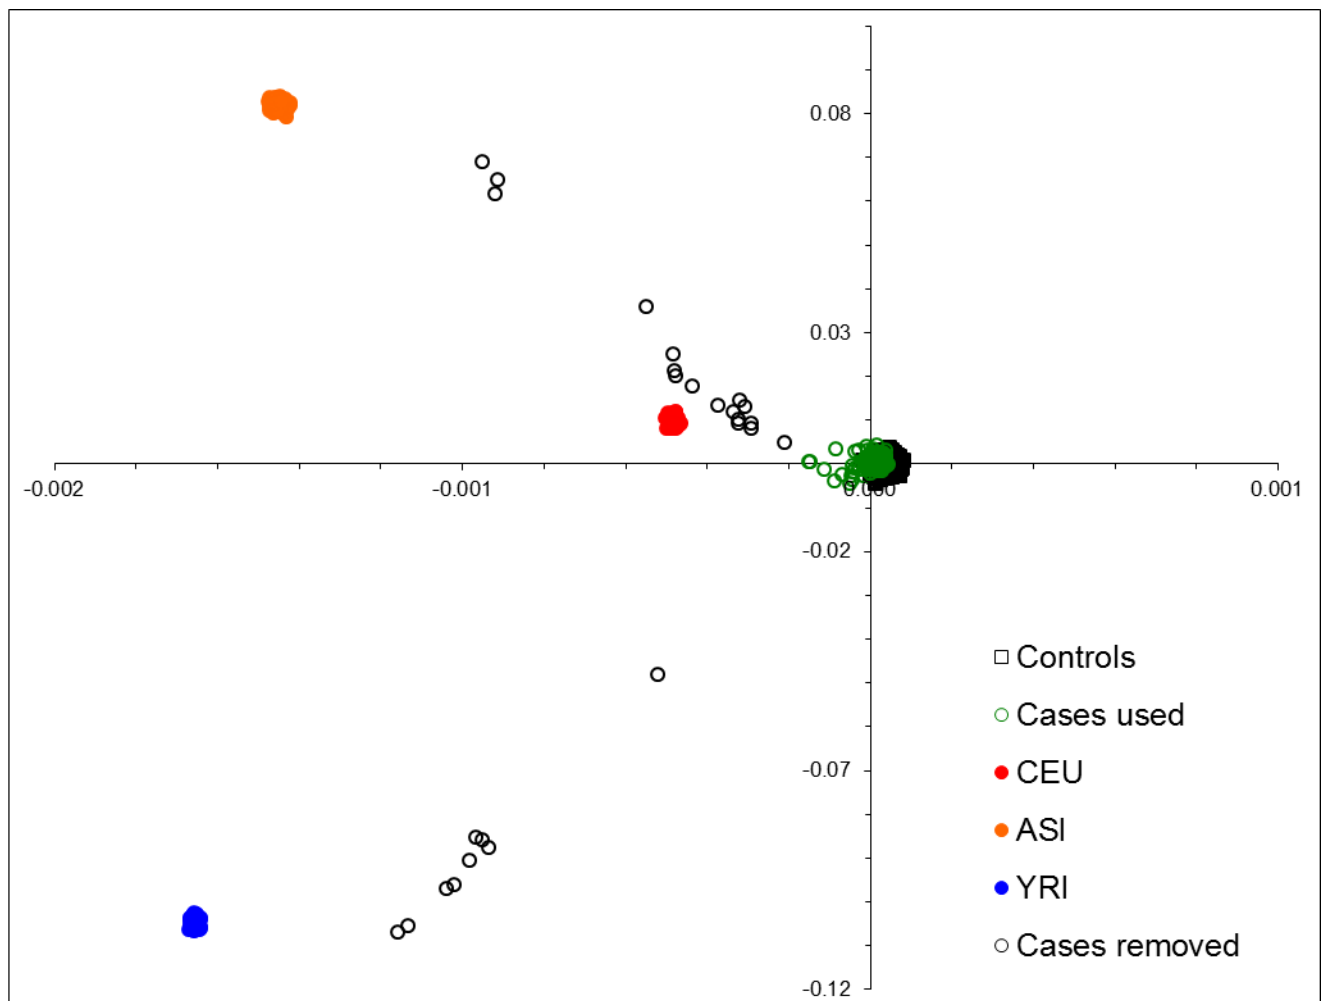

MPN cases (green and black circles) and WTCCC2 controls (black squares) are plotted along with data from HapMap for Utah residents with ancestry from northern and western Europe (CEU, red circles), Japanese and Han Chinese individuals from Tokyo and China (ASI, orange circles), Yoruban individuals from Ibadan, Nigeria (YRI, blue circles). Ethnic groups form separate clusters and MPN cases and WTCCC2 controls cluster together which indicates that they are suitable for comparison. The black circles are MPN cases ( $n=26$ ) that were removed from the analysis because their genotypes did not concur with a European ancestry.

**Supplementary Table 1. Unadjusted p-values for lead SNPs with replication (rsids in bold), independent SNPs from the same region (unformatted rsids) and published SNPs (rsid in italics)**

| <i>JAK2</i> status | <i>JAK2</i> <sup>V617F</sup> negative |                                    |                                    |                       |                                       | <i>JAK2</i> <sup>V617F</sup> positive |                                      |                                       |                                       | NA                                    |
|--------------------|---------------------------------------|------------------------------------|------------------------------------|-----------------------|---------------------------------------|---------------------------------------|--------------------------------------|---------------------------------------|---------------------------------------|---------------------------------------|
| Stage & SNPs       | Stage 1 (no. of SNPs=2098039)         | Stage 2 (no. of SNP =193)          |                                    |                       | Stage 3 (no. of SNPs=5)               |                                       | Stage 3 (no. of SNPs=6)              |                                       |                                       | Stage 3 (no. of SNPs =5)              |
| Cases              | UK1 (n=524)                           | UK2 (n=198)                        | German (n=187)<br>Austrian (n=99)  | Greek (n=460)         | UK3 (n=328)                           | Italian (n=637)                       | UK4 ET and PV (n=1004)               | UK4 ET only (n=499)                   | UK4 PV only (n=505)                   | UK reactive (n=406)                   |
| Controls           | UK national blood service (n=2674)    | UK British birth cohort (n=2706)   | Bavarian (KORA, n=1805)            | Greek (n=1196)        | UK British birth cohort & UK (n=2800) | Italian (INCHIANTI, n=1608)           | UK British birth cohort (n=2706)     | UK British birth cohort (n=2706)      | UK British birth cohort (n=2706)      | UK British birth cohort & UK (n=2800) |
| SNP                | <i>P</i> (OR)                         | <i>P</i> (OR)                      | <i>P</i> (OR)                      | <i>P</i> (OR)         | <i>P</i> (OR)                         | <i>P</i> (OR)                         | <i>P</i> (OR)                        | <i>P</i> (OR)                         | <i>P</i> (OR)                         | <i>P</i> (OR)                         |
| rs12339666         | 0.000605 (1.29)                       | <b>0.00025<sup>††</sup></b> (1.49) | <b>0.00027<sup>††</sup></b> (1.41) | <b>0.02457</b> (1.26) |                                       |                                       | <b>5.43x10<sup>-62*</sup></b> (2.43) | <b>5.344x10<sup>-13*</sup></b> (1.68) | <b>1.286x10<sup>-75*</sup></b> (3.50) |                                       |
| rs2201862          | 0.001301 (0.80)                       | <b>0.00028<sup>††</sup></b> (0.68) | 0.1611 (0.88)                      | 0.07322 (0.87)        | <b>0.03847</b> (0.84)                 | <b>0.00631<sup>†</sup></b> (0.83)     | <b>0.03681</b> (0.89)                | 0.1716 (0.91)                         | 0.07326 (0.88)                        | 0.1497 (0.89)                         |
| rs4955627          | 0.000304 (1.28)                       | <b>0.03847</b> (1.25)              | 0.7278 (1.03)                      | 0.6185 (0.95)         |                                       |                                       |                                      |                                       |                                       |                                       |
| rs16853092         | 1.48x10 <sup>-5</sup> (1.55)          | <b>0.02134</b> (1.43)              |                                    | 0.8993 (0.98)         |                                       |                                       |                                      |                                       |                                       |                                       |
| rs9376092          | 0.001619 (1.26)                       | 0.7106 (1.04)                      | <b>0.00078<sup>†</sup></b> (1.39)  | 0.3903 (0.92)         | 0.3182 (1.10)                         | <b>0.00099<sup>††</sup></b> (1.28)    | 0.05655 (1.12)                       | <b>2.62x10<sup>-6*</sup></b> (1.41)   | <i>0.06825</i> (0.87)                 | 0.3854 (1.08)                         |
| rs4858647          | 0.000587 (1.42)                       | 0.5773 (1.10)                      | <b>0.00167<sup>†</sup></b> (1.57)  | <b>0.0179</b> (1.29)  | <b>0.00366<sup>††</sup></b> (1.43)    | <i>0.02232</i> (0.75)                 | 0.6891 (1.04)                        | 0.7167 (1.04)                         | 0.8049 (1.03)                         | 0.3009 (1.14)                         |
| rs4858594          | 0.000539 (0.79)                       | 0.6073 (1.06)                      | 0.5363 (1.06)                      | 0.4426 (1.07)         |                                       |                                       |                                      |                                       |                                       |                                       |
| rs4858576          | 0.000148 (0.71)                       | 0.1022 (0.80)                      | 0.5497 (1.07)                      | 0.6037 (0.94)         |                                       |                                       |                                      |                                       |                                       |                                       |
| rs4858095          | 4.006x10 <sup>-6</sup> (0.68)         | 0.5813 (1.07)                      | 0.944 (0.99)                       | 0.6829 (0.96)         |                                       |                                       |                                      |                                       |                                       |                                       |
| rs2736100          | 0.000409 (1.27)                       |                                    | 0.00830 (1.49)                     |                       |                                       |                                       | <b>1.92x10<sup>-21*</sup></b> (1.66) | <b>8.179x10<sup>-12*</sup></b> (1.62) | <b>3.153x10<sup>-14*</sup></b> (1.71) |                                       |

Abbreviation: *P* = Unadjusted *P*-value for allelic chi-square test. OR = Estimated odds ratio. \*Significant after Bonferroni correction for 193 tests at stage 2 and 5 tests at stage 3. <sup>†</sup>Significant after correction for False Discovery Rate. Nominally significant (*P*-value ≤0.05) replication in bold. Values in italics indicate effects in opposite direction compared with stage 1. Cells are blank if the SNP was not genotyped.



**Supplementary Table 2. MYB and HBS1L expression data in healthy controls**

| Gene                     | cell type       | Genotype group | N  | median normalised expression level (range) | P value | fold expression decrease (median normalised expression level of AA/AC group/CC group) |
|--------------------------|-----------------|----------------|----|--------------------------------------------|---------|---------------------------------------------------------------------------------------|
| <i>MYB</i> (exons 5-6)   | PB granulocytes | AA/AC          | 19 | 0.22 (0.04-1.78)                           | 0.4566  | n/s                                                                                   |
|                          |                 | CC             | 18 | 0.42 (0-3.24)                              |         |                                                                                       |
|                          | BFU-E           | AA/AC          | 18 | 1.33 (0.37-17)                             | 0.0001  | 5.8                                                                                   |
|                          |                 | CC             | 14 | 7.76 (2.38-82.2)                           |         |                                                                                       |
|                          | CFU-GM          | AA/AC          | 18 | 1.93 (0.54-10.4)                           | 0.0001  | 8.5                                                                                   |
|                          |                 | CC             | 12 | 16.5 (1.66-42.2)                           |         |                                                                                       |
| <i>MYB</i> (exons 10-13) | PB granulocytes | AA/AC          | 19 | 0.03 (0-0.11)                              | <0.0001 | 8                                                                                     |
|                          |                 | CC             | 17 | 0.24 (0-2.33)                              |         |                                                                                       |
|                          | BFU-E           | AA/AC          | 18 | 0.445 (0.02-0.85)                          | 0.0056  | 9.7                                                                                   |
|                          |                 | CC             | 14 | 4.31 (0.07-18.3)                           |         |                                                                                       |
|                          | CFU-GM          | AA/AC          | 18 | 0.485 (0.05-0.84)                          | 0.0945  | 6                                                                                     |
|                          |                 | CC             | 12 | 2.92 (0.03-27.1)                           |         |                                                                                       |
| <i>HBS1L</i>             | PB granulocytes | AA/AC          | 18 | 0.72 (0.01-3.43)                           | 1       | n/s                                                                                   |
|                          |                 | CC             | 15 | 0.62 (0.11-8.42)                           |         |                                                                                       |
|                          | BFU-E           | AA/AC          | 18 | 0.715 (0.18-8.75)                          | 0.0384  | 1.95                                                                                  |
|                          |                 | CC             | 14 | 1.4 (0.59-10.3)                            |         |                                                                                       |
|                          | CFU-GM          | AA/AC          | 18 | 0.1 (0.02-0.4)                             | 0.0003  | 2.4                                                                                   |
|                          |                 | CC             | 12 | 0.24 (0.15-0.81)                           |         |                                                                                       |

**Supplementary Table 3. Laboratory and clinical features at diagnosis and major thrombotic, hemorrhagic and transformation events after trial entry and in the year before diagnosis, in *JAK2*<sup>V617F</sup> negative patients compared to MPN risk allele genotype.**

**A. rs2201862**

|                                                                                                               | homozygous<br>minor allele | heterozygous | homozygous<br>major allele | <i>P</i><br>value <sup>1</sup> |
|---------------------------------------------------------------------------------------------------------------|----------------------------|--------------|----------------------------|--------------------------------|
| <b>Genotypes of <i>JAK2</i> V617F negative MPN (n=308)</b>                                                    |                            |              |                            |                                |
| rs2201862 genotypes                                                                                           | CC                         | CT           | TT                         |                                |
| Number (frequency)                                                                                            | 56 (0.182)                 | 145 (0.471)  | 107 (0.347)                |                                |
| <b>Laboratory and clinical features at diagnosis</b>                                                          |                            |              |                            |                                |
| Age (yr.)- mean ± SD                                                                                          | 52 ± 16                    | 53 ± 16      | 52 ± 15                    | 0.281                          |
| Hemoglobin (g/L)- mean ± SD                                                                                   | 13 ± 1.3                   | 14 ± 1.4     | 14 ± 1.2                   | 0.143                          |
| White cells (x10 <sup>9</sup> /L)- mean ± SD                                                                  | 9.2 ± 2.6                  | 9.4 ± 2.8    | 9.5 ± 2.6                  | 0.515                          |
| Platelet count (x10 <sup>9</sup> /L)- mean ± SD                                                               | 1060 ± 377                 | 1040 ± 339   | 981 ± 319                  | 0.101                          |
| <b>Major thrombotic, hemorrhagic and transformation events after trial entry and in year before diagnosis</b> |                            |              |                            |                                |
| <b>Arterial thrombosis</b>                                                                                    |                            |              |                            |                                |
| In year before diagnosis                                                                                      | 18                         | 29           | 12                         | 0.970                          |
| After trial entry                                                                                             | 14                         | 17           | 10                         | 0.594                          |
| <b>Venous thromboembolism</b>                                                                                 |                            |              |                            |                                |
| In year before diagnosis                                                                                      | 6                          | 3            | 3                          | 0.470                          |
| After trial entry                                                                                             | 6                          | 6            | 3                          | 0.799                          |
| <b>Major haemorrhage</b>                                                                                      |                            |              |                            |                                |
| After trial entry                                                                                             | 6                          | 20           | 4                          | 0.112                          |
| <b>Death</b>                                                                                                  |                            |              |                            |                                |
|                                                                                                               | 13                         | 28           | 12                         | 0.374                          |
| <b>Hematological transformation</b>                                                                           |                            |              |                            |                                |
| Myelofibrosis                                                                                                 | 9                          | 6            | 5                          | 0.302                          |
| MDS/AML                                                                                                       | 2                          | 4            | 2                          | 0.875                          |
| Polycythemia vera                                                                                             | 3                          | 3            | 0                          | 0.422                          |
| <b>Response to therapy</b>                                                                                    |                            |              |                            |                                |
| Effect of SNP on response to therapy for Hb                                                                   |                            |              |                            | 0.150                          |
| Effect of SNP on response to therapy for Plt count                                                            |                            |              |                            | 0.846                          |
| Effect of SNP on response to therapy for WCC                                                                  |                            |              |                            | 0.808                          |

**B. rs9376092**

|                                                                                                               | homozygous<br>minor allele | heterozygous | homozygous<br>major allele | <i>P</i><br>value <sup>1</sup> |
|---------------------------------------------------------------------------------------------------------------|----------------------------|--------------|----------------------------|--------------------------------|
| <b>Genotypes of JAK2 V617F negative MPN (n=308)</b>                                                           |                            |              |                            |                                |
| rs9376092 genotypes                                                                                           | AA                         | AC           | CC                         |                                |
| Number (frequency)                                                                                            | 27 (0.088)                 | 145 (0.471)  | 136 (0.442)                |                                |
| <b>Laboratory and clinical features at diagnosis</b>                                                          |                            |              |                            |                                |
| Age (yr.)- mean ± SD                                                                                          | 55 ± 17                    | 53 ± 16      | 51 ± 15                    | 0.722                          |
| Hemoglobin (g/L)- mean ± SD                                                                                   | 13 ± 1.2                   | 13 ± 1.4     | 14 ± 1.3                   | 0.212                          |
| White cells (x10 <sup>9</sup> /L)- mean ± SD                                                                  | 9.2 ± 2.5                  | 9.2 ± 2.6    | 9.5 ± 2.8                  | 0.500                          |
| Platelet count (x10 <sup>9</sup> /L)- mean ± SD                                                               | 978 ± 269                  | 1030 ± 345   | 1050 ± 368                 | 0.548                          |
| <b>Major thrombotic, hemorrhagic and transformation events after trial entry and in year before diagnosis</b> |                            |              |                            |                                |
| <b>Arterial thrombosis</b>                                                                                    |                            |              |                            |                                |
| In year before diagnosis                                                                                      | 7                          | 29           | 22                         | 0.430                          |
| After trial entry                                                                                             | 7                          | 19           | 15                         | 0.353                          |
| <b>Venous thromboembolism</b>                                                                                 |                            |              |                            |                                |
| In year before diagnosis                                                                                      | 3                          | 7            | 2                          | <b>0.033</b>                   |
| After trial entry                                                                                             | 4                          | 5            | 6                          | 0.150                          |
| <b>Major haemorrhage</b>                                                                                      |                            |              |                            |                                |
| After trial entry                                                                                             | 7                          | 11           | 11                         | 0.073                          |
| <b>Death</b>                                                                                                  |                            |              |                            |                                |
|                                                                                                               | 5                          | 26           | 22                         | 0.808                          |
| <b>Hematological transformation</b>                                                                           |                            |              |                            |                                |
| Myelofibrosis                                                                                                 | 1                          | 11           | 8                          | 0.529                          |
| MDS/AML                                                                                                       | 0                          | 5            | 2                          | 0.301                          |
| Polycythemia vera                                                                                             | 0                          | 2            | 4                          | 0.473                          |
| <b>Response to therapy</b>                                                                                    |                            |              |                            |                                |
| Effect of SNP on response to therapy for Hb                                                                   |                            |              |                            | 0.858                          |
| Effect of SNP on response to therapy for Plt count                                                            |                            |              |                            | 0.100                          |
| Effect of SNP on response to therapy for WCC                                                                  |                            |              |                            | 0.731                          |

**C. rs4858647**

|                                                                                                               | homozygous<br>minor allele | heterozygous | homozygous<br>major allele | <i>P</i><br>value <sup>1</sup> |
|---------------------------------------------------------------------------------------------------------------|----------------------------|--------------|----------------------------|--------------------------------|
| <b>Genotypes of JAK2 V617F negative MPN (n=306)</b>                                                           |                            |              |                            |                                |
| rs4858647 genotypes                                                                                           | AA                         | AC           | CC                         |                                |
| Number (frequency)                                                                                            | 7 (0.023)                  | 73 (0.239)   | 226 (0.739)                |                                |
| <b>Laboratory and clinical features at diagnosis</b>                                                          |                            |              |                            |                                |
| Age (yr.)- mean ± SD                                                                                          | 52 ± 22                    | 50 ± 16      | 53 ± 16                    | 0.583                          |
| Hemoglobin (g/L)- mean ± SD                                                                                   | 13 ± 1.2                   | 14 ± 1.3     | 14 ± 1.3                   | 0.769                          |
| White cells (x10 <sup>9</sup> /L)- mean ± SD                                                                  | 9.1 ± 2.3                  | 9.4 ± 2.6    | 9.4 ± 2.7                  | 0.566                          |
| Platelet count (x10 <sup>9</sup> /L)- mean ± SD                                                               | 962 ± 181                  | 1030 ± 361   | 1040 ± 348                 | 0.597                          |
| <b>Major thrombotic, hemorrhagic and transformation events after trial entry and in year before diagnosis</b> |                            |              |                            |                                |
| <b>Arterial thrombosis</b>                                                                                    |                            |              |                            |                                |
| In year before diagnosis                                                                                      | 1                          | 10           | 48                         | 0.390                          |
| After trial entry                                                                                             | 2                          | 6            | 33                         | 0.187                          |
| <b>Venous thromboembolism</b>                                                                                 |                            |              |                            |                                |
| In year before diagnosis                                                                                      | 0                          | 3            | 9                          | 0.970                          |
| After trial entry                                                                                             | 0                          | 0            | 15                         | 0.110                          |
| <b>Major haemorrhage</b>                                                                                      |                            |              |                            |                                |
| After trial entry                                                                                             | 1                          | 4            | 25                         | 0.486                          |
| <b>Death</b>                                                                                                  |                            |              |                            |                                |
| After trial entry                                                                                             | 3                          | 11           | 39                         | 0.052                          |
| <b>Hematological transformation</b>                                                                           |                            |              |                            |                                |
| Myelofibrosis                                                                                                 | 0                          | 7            | 13                         | 0.212                          |
| MDS/AML                                                                                                       | 0                          | 2            | 5                          | 0.823                          |
| Polycythemia vera                                                                                             | 0                          | 2            | 4                          | 0.745                          |
| <b>Response to therapy</b>                                                                                    |                            |              |                            |                                |
| Effect of SNP on response to therapy for Hb                                                                   |                            |              |                            | 0.023                          |
| Effect of SNP on response to therapy for Plt count                                                            |                            |              |                            | 0.686                          |
| Effect of SNP on response to therapy for WCC                                                                  |                            |              |                            | 0.912                          |

#### D. rs17049659

|                                                                                                               | homozygous<br>minor allele | heterozygous | homozygous<br>major allele | <i>P</i><br>value <sup>1</sup> |
|---------------------------------------------------------------------------------------------------------------|----------------------------|--------------|----------------------------|--------------------------------|
| <b>Genotypes of JAK2 V617F negative MPN (n=304)</b>                                                           |                            |              |                            |                                |
| rs17049659 genotypes                                                                                          | CC                         | CT           | TT                         |                                |
| Number (frequency)                                                                                            | 0 (0)                      | 23 (0.076)   | 281 (0.924)                |                                |
| <b>Laboratory and clinical features at diagnosis</b>                                                          |                            |              |                            |                                |
| Age (yr.)- mean ± SD                                                                                          | 0                          | 57 ± 18      | 52 ± 16                    | 0.695                          |
| Hemoglobin (g/L)- mean ± SD                                                                                   | 0                          | 13 ± 1.5     | 14 ± 1.3                   | 0.321                          |
| White cells (x10 <sup>9</sup> /L)- mean ± SD                                                                  | 0                          | 9.1 ± 2.6    | 9.4 ± 2.7                  | 0.875                          |
| Platelet count (x10 <sup>9</sup> /L)- mean ± SD                                                               | 0                          | 1110 ± 478   | 1030 ± 333                 | 0.921                          |
| <b>Major thrombotic, hemorrhagic and transformation events after trial entry and in year before diagnosis</b> |                            |              |                            |                                |
| <b>Arterial thrombosis</b>                                                                                    |                            |              |                            |                                |
| In year before diagnosis                                                                                      | 0                          | 2            | 57                         | 0.370                          |
| After trial entry                                                                                             | 0                          | 4            | 37                         | 0.242                          |
| <b>Venous thromboembolism</b>                                                                                 |                            |              |                            |                                |
| In year before diagnosis                                                                                      | 0                          | 2            | 10                         | 0.120                          |
| After trial entry                                                                                             | 0                          | 1            | 12                         | 0.654                          |
| <b>Major haemorrhage</b>                                                                                      |                            |              |                            |                                |
| After trial entry                                                                                             | 0                          | 2            | 28                         | 0.718                          |
| <b>Death</b>                                                                                                  |                            |              |                            |                                |
|                                                                                                               | 0                          | 4            | 48                         | 0.427                          |
| <b>Hematological transformation</b>                                                                           |                            |              |                            |                                |
| Myelofibrosis                                                                                                 | 0                          | 1            | 19                         | 0.991                          |
| MDS/AML                                                                                                       | 0                          | 0            | 7                          | 0.548                          |
| Polycythemia vera                                                                                             | 0                          | 1            | 5                          | 0.239                          |
| <b>Response to therapy</b>                                                                                    |                            |              |                            |                                |
| Effect of SNP on response to therapy for Hb                                                                   |                            |              |                            | 0.287                          |
| Effect of SNP on response to therapy for Plt count                                                            |                            |              |                            | 0.749                          |
| Effect of SNP on response to therapy for WCC                                                                  |                            |              |                            | 0.381                          |

<sup>1</sup>For response to therapy, this was assessed by chi-squared test for trend for events preceding diagnosis and log-rank test for events after trial entry.

**Supplementary Table 4. Primer sequences**

| Gene        | Primer name    | Sequence (5'-3')                  |
|-------------|----------------|-----------------------------------|
| <i>GUSB</i> | GUSB_EAC_F     | GAAAATATGTGGTTGGAGAGCTCATT        |
|             | GUSB_EAC_R     | CCAGCACTCTCGTCGGTGACTGTTCA        |
|             | GUSB_EAC_probe | 6-FAM-CCGAGTGAAGATCCCCTTTTAA-BHQ1 |
| <i>HMIP</i> | rs9376092seq_F | AAATGGCAGCTGGTGAAGTCAGAA          |
|             | rs9376092seq_R | GAAGAGTGGTGATCATTGGGTTGG          |
| <i>CALR</i> | CALR_seq_F     | CTGGTCCTGGTCCTGATGTC              |
|             | CALR_seq_R     | CAGTCCAGCCCTGGAGGCAG              |
| <i>CALR</i> | CALR_FA_F      | GCAGCAGAGAAACAAATGAAGGACA         |
|             | CALR_FA_R      | CCTCATCCTCATCTTTGTCCTCATCA        |
| <i>MPL</i>  | MPL_pyro_F     | TGACCGCTCTGCATCTAGTG              |
|             | MPL_pyro_R     | Bio-GGGTCACAGAGCGAACCA            |
|             | MPL_pyro_seq   | CCTGCTGCTGCTGAG                   |

**Supplementary Table 5. TaqMan assays**

| Gene         | Exon location       | ABI assay number |
|--------------|---------------------|------------------|
| <i>MYB</i>   | 5-6                 | Hs00920558_m1    |
|              | 10-11, 11-12, 12-13 | Hs00920563_g1    |
| <i>HBS1L</i> | 1-2                 | Hs04188641_g1    |

**Supplementary Table 6. Association after stage 1 and meta-analysis including and excluding cases with LOH**

| SNP        | Stage 1       |      |               |      | Meta analysis          |      |                        |      |
|------------|---------------|------|---------------|------|------------------------|------|------------------------|------|
|            | Including LOH |      | Excluding LOH |      | Including LOH          |      | Excluding LOH          |      |
|            | <i>p</i>      | OR   | <i>P</i>      | OR   | <i>P</i>               | OR   | <i>P</i>               | OR   |
| rs12339666 | 0.000605      | 1.29 | 0.0003712     | 1.31 | 1.27x10 <sup>-10</sup> | 1.34 | 7.19x10 <sup>-11</sup> | 1.35 |
| rs2201862  | 0.001301      | 0.80 | 0.001813      | 0.80 | 1.96x10 <sup>-9</sup>  | 0.82 | 2.68x10 <sup>-9</sup>  | 0.82 |
| rs9376092  | 0.001619      | 1.26 | 0.00332       | 1.25 | 5.27x10 <sup>-6</sup>  | 1.18 | 9.28x10 <sup>-6</sup>  | 1.17 |
| rs4858647  | 0.000587      | 1.42 | 0.01667       | 1.30 | 1.39x10 <sup>-5</sup>  | 1.24 | 0.0001                 | 1.22 |
| rs2736100  | 0.000409      | 1.27 | 0.0003678     | 1.29 | 1.73x10 <sup>-5</sup>  | 1.31 | 1.51x10 <sup>-5</sup>  | 1.32 |

**Supplementary Table 7. Exact test for deviation from Hardy-Weinberg equilibrium in MPN cases**

| SNP        | Heterozygosity in actual data |          |          | Heterozygosity after simulation of LOH randomly affecting 10% of cases |          |                         |
|------------|-------------------------------|----------|----------|------------------------------------------------------------------------|----------|-------------------------|
|            | Observed                      | Expected | <i>P</i> | Observed                                                               | Expected | <i>P</i>                |
| rs12339666 | 0.4398                        | 0.4247   | 0.4712   | 0.3327                                                                 | 0.4025   | 0.0001264               |
| rs2201862  | 0.4905                        | 0.4949   | 0.8599   | 0.4447                                                                 | 0.5      | 0.01135                 |
| rs9376092  | 0.437                         | 0.439    | 0.9208   | 0.3779                                                                 | 0.4197   | 0.02237                 |
| rs4858647  | 0.2226                        | 0.2326   | 0.3441   | 0.1631                                                                 | 0.2396   | 1.524x10 <sup>-10</sup> |
| rs2736100  | 0.521                         | 0.4913   | 0.1829   | 0.4275                                                                 | 0.4999   | 0.0009014               |

**Supplementary References**

1. Chen, E., *et al.* Distinct clinical phenotypes associated with JAK2<sup>V617F</sup> reflect differential JAK2 signalling. *Cancer Cell*. 18, 524-535 (2010)
2. Klampfl, T. *et al.* Somatic mutations of calreticulin in myeloproliferative neoplasms. *N Engl J Med*. **369**, 2379-2390 (2013).
